# Supplementary material
Source: ML conference proceedings conference paper supplement (https://openaccess.thecvf.com/content/CVPR2026/html/Zuo_FlowFM_Advancing_Dark_CVPR_2026_paper.html)
Supplement: Supplementary file 1 [file Zuo_FlowFM_Advancing_Dark_CVPR_2026_supplemental.pdf]

# FlowFM: Advancing Dark Optical Flow Estimation with Flow Matching

Anonymous CVPR submission

Paper ID

## 001 1. Feature Encoding

### 002 1.1. Feature and Context Backbone

003 We follow a similar design to the well-known RAFT [22],  
 004 incorporating a feature backbone and a context feature  
 005 backbone. The latter is introduced to extract the original  
 006 features at 1/8 resolution, mapping  $F_{1\&2} \in \mathbb{R}^{3 \times H \times W}$  to  
 007  $\mathbf{x}' \in \mathbb{R}^{C \times H/8 \times W/8}$  where we set  $C$  is set to 256. Both the  
 008 feature and context backbones consist of 6 residual blocks:  
 009 2 at 1/2 resolution, 2 at 1/4 resolution, and 2 at 1/8 res-  
 010 olution. Furthermore, the structure of the context back-  
 011 bone is identical to that of the feature backbone, except that  
 012 BatchNorm regularization is used in the context branch and  
 013 InstanceNorm in the feature backbone, respectively. **The**  
 014 **code will be made publicly available upon the paper's**  
 015 **acceptance, and we kindly ask for your understanding.**

### 016 1.2. Gated Attention Encoder

017 In DOFE computation, dark degradations critically under-  
 018 mine the accuracy of long-range feature matching. In par-  
 019 ticular, the inherent sinks of the attention mechanism may  
 020 cause key features to be overlooked in a single frame dur-  
 021 ing the feature affinity process. This phenomenon becomes  
 022 especially pronounced in conditions characterized by noise  
 023 and darkness. To counteract this, we introduce a novel gated  
 024 attention encoder (GAE) that synergistically combines a  
 025 gated modulation module (GMM) and a masked feature en-  
 026 coder (MFE) to achieve more discriminative modeling of  
 027 large motions. To effectively ensure feature interaction,  
 028 our GMM first modulates MFE to capture spatially coher-  
 029 ent features, background, and object details. Currently, our  
 030 MFE uses a gated strategy to capture fine-grained features,  
 031 and  $h$  distinct  $k$  values to dynamically control the mag-  
 032 nitude of mask sparsity, enabling parallel encoding of salient  
 033 top- $k$  global features while suppressing noise and inter-  
 034 ference.

035 **Gated Modulation Module.** To begin with, GMM is de-  
 036 signed to generate multiple components, including offset  
 037 priors for basic feature enhancement, and spatial and chan-  
 038 nel convolutional attention that provide dynamic properties  
 039 for long-term information aggregation. Given the basic fea-

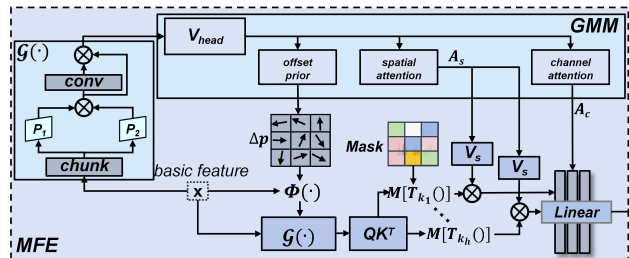

Figure 1. Overview of the proposed Gated Attention Encoder.

040 ture  $\mathbf{x} \in \mathbb{R}^{C \times H/8 \times W/8}$  from the feature backbone, the  
 041 GMM is,

$$042 \begin{aligned} \mathbf{V} &= \mathbf{V}_{\text{head}}(\mathcal{G}(\mathbf{x}')), \Delta p = r \cdot f_{\text{offsets}}(\mathbf{V}), \\ \mathbf{A}_s &= f_{\text{spatial}}(\mathbf{V}), \mathbf{A}_c = f_{\text{channel}}(\mathbf{V}), \end{aligned} \quad (1)$$

043 where  $\mathcal{G}(\cdot)$  denotes our proposed gated block. Practically,  
 044 input features are split into two equal-sized chunks, with  
 045 matrix multiplication computed between them to derive at-  
 046 tention weights. As shown in Fig.1, a  $3 \times 3$  convolution  
 047 block is then introduced to extract fine-grained features,  
 048 followed by fusing the convolved result with the attention  
 049 weights. This strategy anchors attention weight calculation  
 050 on local and global interactions of input features, rather than  
 051 over-binding to fixed feature positions, mitigating attention  
 052 concentration on a single sink position.  $\mathbf{V}_{\text{head}}(\cdot)$  projects  
 053 the feature  $\mathbf{x}$  to the Value  $\mathbf{V}$ .  $\Delta p \in \mathbb{R}^{2 \times h \times w}$  denotes the  
 054 offset that warps the basic characteristic  $\mathbf{x}$  to enhance the  
 055 expression of the object.  $r$  is a scalar that controls the offset  
 056 range via the tanh function. Besides,  $f_{\text{spatial}}(\cdot)$  denotes spa-  
 057 tial attention implemented with a function *mean* and convo-  
 058 lutions, while  $f_{\text{channel}}(\cdot)$  is channel attention that includes  
 059 avgpool, sigmoid, and convolutions.

060 **Masked Feature Encoder.** After that, the offset  $\Delta p$  is in-  
 061 tegrated into the basic feature  $\mathbf{x}$  using bilinear interpola-  
 062 tion  $\phi(\cdot)$ , enabling the MFE to achieve more flexible and  
 063 content-adaptive learning,

$$064 \mathbf{x}_{\Delta} = \phi(\mathbf{x}', \Delta p), \quad (2)$$

065 After that, we project  $\mathbf{x}_{\Delta}$  and  $\mathbf{x}$  through a depth-wise  
 066 layer  $\text{QK}_{\text{head}}(\cdot)$  to obtain the query and key maps. In the

Table 1. EPE comparisons by switch components within RAFT and GMA, and FlowFM frameworks (trained on FCDN).

| Task     | Method                | Para.(M) | EPE↓        |              |
|----------|-----------------------|----------|-------------|--------------|
|          |                       |          | FCDN        | VBOF         |
| Feature  | RAFT                  | 5.26     | 1.23        | 21.84        |
|          | +DBME                 | 7.61     | 1.14        | 21.43        |
|          | +Def.                 | 7.67     | 1.17        | 21.52        |
|          | +SpE                  | 8.28     | 1.15        | 21.40        |
|          | +GAE                  | 7.53     | 1.08        | 20.95        |
| Context  | GMA                   | 5.80     | 1.18        | 21.77        |
|          | +DBME                 | 8.21     | 1.14        | 20.75        |
|          | +Trans.               | 6.56     | 1.17        | 21.23        |
|          | +SpE                  | 8.93     | 1.14        | 20.82        |
|          | +MCE                  | 8.21     | 1.12        | 20.69        |
| Exchange | FlowFM                | 12.22    | 0.87        | 13.28        |
|          | all GAE               | 11.93    | 0.92        | 13.79        |
|          | all MCE               | 12.64    | 0.96        | 13.92        |
|          | GAE $\Rightarrow$ MCE | 12.22    | 0.94        | 13.87        |
|          | FlowFM                | 12.22    | <b>0.87</b> | <b>13.28</b> |

067 encoding phase, treating all pixel features equally has long  
 068 been regarded as unsuitable and inefficient; a refinement  
 069 strategy is applied to  $QK^T$  using the top- $k$  function and  
 070 mask matrix. The process is as follows,

$$\begin{aligned}
 Q, K &= QK_{\text{head}}(\mathcal{G}(C[x_{\Delta}, \mathbf{x}'])); V_s = V \cdot A_s, \\
 \mathbf{x}'_h &= \text{softmax}(\mathcal{M}[\mathcal{T}_{k_h}(QK^T/\sqrt{d})]) \cdot V_s, \quad (3) \\
 \mathbf{x} &= f_{\text{linear}}(C[\mathbf{x}'_1, \dots, \mathbf{x}'_h]) \cdot A_c,
 \end{aligned}$$

072 where  $\mathcal{T}_k(\cdot)$  performs a top- $k$  selection, identifying the sig-  
 073 nificant feature pairs of  $k$ . A mask matrix  $\mathcal{M} \in \mathbb{R}^{C_m \times C_m}$   
 074 sets the scores of non-top- $k$  elements to negative infinity,  
 075 thereby filtering out deceptive affinities caused by interfer-  
 076 ence. Yet, relying on a single top- $k$  may erroneously shield  
 077 important features. Consequently, we adopt  $h$  distinct top- $k$   
 078 values to dynamically adjust the mask sparsity magnitude in  
 079 parallel, denoted as  $\mathcal{T}_{k_h}(\cdot)$ . Notably,  $h$  is not multi-head, but  
 080 the number of parallel branches with distinct top- $k$  settings,  
 081 and using these top- $k$  selections effectively suppresses stub-  
 082 born interference and reduces motion asymmetry-related  
 083 uncertainty. Lastly,  $f_{\text{linear}}(\cdot)$  is a linear block that serves  
 084 as an adjustment strategy, recalibrating the importance of  
 085 encoded channel-wise expressions through attention  $A_c$ .

### 086 1.3. MLP-based Context Encoder

087 After the context backbone computation, we introduce an  
 088 MLP-based context encoder (MCE) for reliable scene and  
 089 background motion analysis. As illustrated in Fig.2, we first  
 090 use a LayerNorm layer and a Linear module to refine low-  
 091 level contextual representations. These features are then fed  
 092 into a depth-wise convolution layer to precisely highlight

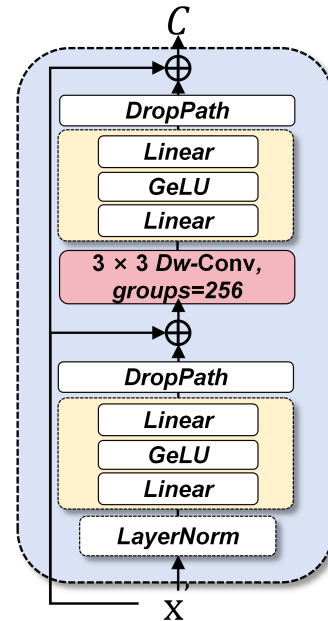

Figure 2. Overview of the proposed MLP-based Context Encoder.

093 spatial consistency and make them more expressive, precisely.  
 094 Subsequently, the features are fed into another MLP  
 095 module to capture global features and improve the under-  
 096 standing of contextual information. The resulting outputs  
 097 from the MCE can facilitate global connections and inter-  
 098 actions, capturing holistic scene patterns crucial for better  
 099 performance.

### 1.4. Comparison with Different Encoders.

101 **Task Feature.** We conducted a comparison among our  
 102 Gated Attention Encoder (GAE), dual-branch motion en-  
 103 coder (DBME) [31], deformable attention methods (Def.)  
 104 [30], and sparse attention encoder (SpE) [32] within the  
 105 RAFT framework. As shown in Tab. 1 (Task Feature), the  
 106 RAFT equipped with GAE delivers outstanding EPE val-  
 107 ues of 1.08 and 20.95 on the FCDN and VBOF datasets,  
 108 markedly outperforming recent methods like DBME by  
 109 5.26% and 2.24%; and Def. by 7.69% and 2.65% mar-  
 110 gins. This is because DBME’s effectiveness is constrained  
 111 by its reliance on a rigid convolutional space, rendering it  
 112 susceptible to neighboring noise and visual degradation due  
 113 to the lack of robustness to long-range pixel connections.  
 114 Def. is hindered by its oversimplified object modeling, re-  
 115 sulting in ineffective global understanding and inadequate  
 116 interference suppression in dark scenarios. Although SpE  
 117 incorporates an anti-interference mechanism, the inherent  
 118 flaw of attention sinking induced by darkness hinders the  
 119 extraction of more effective motion-related information. In  
 120 contrast, our GAE starts with interference suppression, dy-  
 121 namic perception, and mitigating attention sinking, which  
 122 significantly enhances feature learning in dark scenarios.

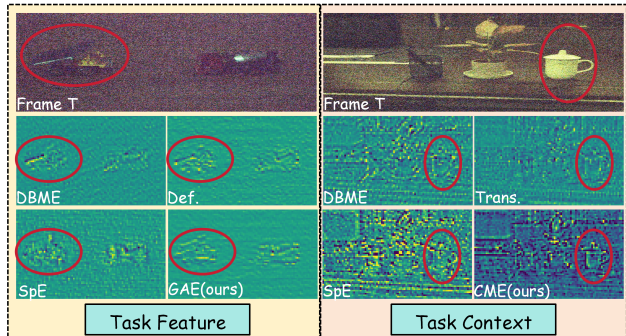

Figure 3. Visualization of the feature maps of different components. Two sets of input frames and corresponding feature maps at different stages are depicted in the feature pipeline and the context pipeline. Zoom in for details.

Meanwhile, our GAE, with its integrated MFE, offers fewer parameters than DBME, Def., and SpE while providing substantial improvements in the global feature encoding performance of DOFE tasks.

**Task Context.** We compare our MLP-based context encoder (MCE) with the DBME, SpE, and Transformers (Trans) blocks [25] on a common baseline GMA [9] to ensure fair evaluation. As indicated in **Tab. 1** (Task Context), our MCE’s contextual representations with linear layers realize notable enhancements, reducing the EPE value from 1.18 to 1.12 on FCDN and from 21.77 to 20.69 on VBOF. Compared with DBME and SpE methods, our MCE is specifically designed for contextual feature learning. It enables cross-dimensional context extraction and dynamic enhancement through the interaction between MLP-based transformations in the channel dimension and depthwise convolutions in the spatial dimension.

**Task Exchange.** Under Task Exchange, both GAE and MCE modules, are employed following the backbone layer. It is evident that there is a significant performance drop, and the two modules exhibit distinct strengths: in contrast to MCE, which excels at extracting more robust contextual information for scene understanding through cross-dimensional interaction; our GAE demonstrates superior capability in perceiving the underlying feature representations in the dark. Finally, the interchangeability of GAE and MCE proves to be unsatisfactory, further confirming that both modules are task-oriented by design and play a crucial role in DOFE.

**Visual Experiment.** We provide a visualization of features between task features and task contexts. As shown in **Fig. 3** (Task Feature), the red boxes highlight that the car produced by GAE exhibits smoother features and more complete target information, whereas the car’s details from other methods are more distorted. In **Fig. 3** (Task Context), our MCE enables feature extraction that retains richer scene information, with more distinct cup contours and appearance details within the red-boxed regions.

Table 2. EPE comparisons by switch different components within GAE and MCE (trained on FCDN).

| Task | Method                   | Para.(M)     | EPE↓        |              |
|------|--------------------------|--------------|-------------|--------------|
|      |                          |              | FCDN        | VBOF         |
|      | FlowFM                   | <b>12.22</b> | <b>0.87</b> | <b>13.28</b> |
| GAE  | w/o $\mathcal{G}(\cdot)$ | 11.99        | 0.91        | 13.68        |
|      | w/o GMM                  | 11.27        | 0.93        | 13.95        |
|      | w/o MFE                  | 11.08        | 0.93        | 14.16        |
| MCE  | w/o MLP                  | 10.44        | 0.92        | 14.35        |
|      | w/o Dw-Conv              | 11.59        | 0.91        | 14.10        |
|      | w/o Dropout              | 12.22        | 0.88        | 13.40        |
|      | w/o Norm                 | 12.22        | 0.94        | 14.08        |

Table 3. EPE comparisons by adjust parameters  $h$  and  $k$  in MFE (trained on FCDN).  $C$  denotes the channel dimensions.

| $h$ | $k$                                                                   | EPE↓        |              |
|-----|-----------------------------------------------------------------------|-------------|--------------|
|     |                                                                       | FCDN        | VBOF         |
| 0   | -                                                                     | 0.95        | 13.80        |
| 1   | $\frac{C}{2}$                                                         | 0.90        | 13.77        |
| 2   | $\frac{C}{2}, \frac{2C}{3}$                                           | 0.88        | 13.60        |
| 3   | $\frac{C}{2}, \frac{2C}{3}, \frac{3C}{4}$                             | 0.87        | 13.45        |
| 4   | $\frac{C}{2}, \frac{2C}{3}, \frac{3C}{4}, \frac{4C}{5}$               | <b>0.87</b> | <b>13.28</b> |
| 5   | $\frac{C}{2}, \frac{2C}{3}, \frac{3C}{4}, \frac{4C}{5}, \frac{5C}{6}$ | 0.92        | 13.63        |

### 1.5. Ablation on GAE and MCE modules.

To validate the effectiveness of GAE, we performed an ablation experiment by systematically removing its components. As detailed in row 1 of **Tab. 2**, we eliminated the gated strategy  $\mathcal{G}(\cdot)$  and directly used the basic features for value projection, which led to an increase of 4.60% in EPE (0.87  $\rightarrow$  0.91) in FCDN and of 3.01% in EPE (13.28  $\rightarrow$  13.68) in VBOF. Subsequently, we removed GMM and replaced MFE with standard self-attention, as indicated in rows 2 and 3. These experiments demonstrate that GMM and MFE play a crucial role in useful feature induction and important long-range information aggregation.

In the 4th to 7th rows of **Tab. 2**, we validated the effectiveness of each component within the MCE module, respectively. Specifically, the experimental results show that removing any single component, including MLP, Dw-Conv, Dropout, and Norm, leads to noticeable performance degradation across key metrics. The corresponding EPE scores show a significant decrease from the full-model, which fully demonstrates that each component of our proposed MCE is indispensable for the DOFE task, as each contributes uniquely to the module’s overall performance.

### 1.6. Analysis on Parameters $h$ and $k$ .

As presented in **Tab. 3**, we empirically assessed the impact of parameter adjustments on performance by tuning  $h$  and

Table 4. Ablation analysis for other attention methods on our model (trained on FCDN).

| Method         | EPE↓        |              |
|----------------|-------------|--------------|
|                | FCDN        | VBOF         |
| Gating Unite   | 0.97        | 14.59        |
| Soft Attention | 1.03        | 14.94        |
| Top- $k$       | <b>0.87</b> | <b>13.28</b> |

Table 5. EPE comparisons by switch different components within IFDD (trained on FCDN).

| Task | Method                          | Para.(M)     | EPE↓        |              |
|------|---------------------------------|--------------|-------------|--------------|
|      |                                 |              | FCDN        | VBOF         |
|      | FlowFM                          | <b>12.22</b> | <b>0.87</b> | <b>13.28</b> |
| IFDD | w/o GRU unite                   | 10.82        | 1.02        | 14.81        |
|      | w/o FMR(+CGA)                   | 11.57        | 0.92        | 13.95        |
|      | w/o FMR(+CDD)                   | 14.24        | 0.90        | 13.66        |
| FMR  | SAM $\rightleftharpoons$ FreEnc | 12.22        | 0.87        | 13.40        |
|      | w/o SAM(Attn)                   | 13.46        | 0.87        | 13.26        |
|      | w/o FreEnc(wavelet)             | 12.75        | 1.14        | 15.29        |
|      | w/o FreEnc(SpDe.)               | 13.18        | 0.95        | 14.57        |

186  $k$  within the MFE. When the top- $k$  settings were adjusted  
 187 to  $\frac{C}{2}$ ,  $\frac{2C}{3}$ ,  $\frac{3C}{4}$  and  $\frac{4C}{5}$ , the EPE in FCDN improved from  
 188 0.88 to 0.85, and in VBOF from 13.79 to 13.28, indicating  
 189 a gradual performance improvement. Nevertheless, contin-  
 190 uing to increase top- $k$  led to a decline in performance.  
 191 This phenomenon arises because a larger top- $k$  value in-  
 192 duces more redundant affinities and ambiguities, which fail  
 193 to provide reliable guidance for refining global motion.

### 194 1.7. Analysis on Different Attentions.

195 As shown in Tab. 4, we performed an ablation study on  
 196 alternative suppression methods within the MFE module.  
 197 Specifically, we substituted the top- $k$  strategy module of our  
 198 MFE with a gating unit [1] and a soft attention unit [12].  
 199 Notably, these alternative methods lack dedicated inter-  
 200 ference suppression mechanisms, resulting in subpar per-  
 201 formance relative to our top- $k$  masking approach when applied  
 202 to the challenging DOFE task. This further confirms the su-  
 203 periority of our top- $k$  masking strategy in targeted inter-  
 204 ference suppression for DOFE.

## 205 2. Motion Denoising Decoder

### 206 2.1. Implicit Fourier Denoising Decoder.

207 In our FlowFM framework, our Implicit Fourier Denois-  
 208 ing Decoder (IFDD) is equipped with gated recurrent units  
 209 (GRUs) for accurate motion hidden state inference. To fur-  
 210 ther verify the effectiveness of IFDD, we conducted addi-  
 211 tional ablation experiments in the supplementary materials,

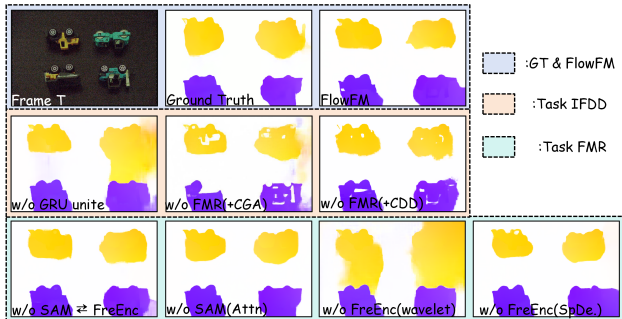

Figure 4. Visualization of the dark optical flow between IFDD and FMR components.

as shown in the Tab.5. To begin with, we removed the GRU  
 unit and directly input the noisy flow into the FMR module  
 for motion decoding. Clearly, performance decreased sig-  
 nificantly. This shows that the latent state inference strat-  
 egy of GRU is crucial for exploring degenerate motion pat-  
 terns. Subsequently, we adopted contour-guided attention  
 (CGA) [32] and conditional denoising decoder (CDD) [16]  
 to replace our FMR module while retaining the GRU mod-  
 ule. Nonetheless, CGA strengthens motion boundaries via  
 long-range feature connections guided by contour priors,  
 yet its limited noise robustness prevents effective suppres-  
 sion of noise present in dark environments. CDD adapts  
 to noise and data distribution through a simple convolu-  
 tional network, while FMR substantially enhances object  
 discriminability in the frequency domain by leveraging the  
 spatial positional relationships of the target, thus achieving  
 state-of-the-art performance in DOFE tasks. These results  
 demonstrate that our IFDD is currently the most well-suited  
 motion denoising decoder for noisy flow.

Fig. 4 presents a set of optical flow comparisons. It can  
 be seen that the performance of ‘w/o GRU unit’ is the worst,  
 demonstrating that GRU plays a crucial role in hidden state  
 inference for dark optical flow estimation. Meanwhile, ‘w/o  
 FMR(+CGA)’ and ‘w/o FMR(+CDD)’ can improve motion  
 discriminability, but there remains a significant gap com-  
 pared with our proposed IFDD method.

### 2.2. Fourier Motion Refactor

As a composite module integrating spatial and frequency-  
 domain optimization, the Fourier Motion Refactor (FMR)  
 processes the input features as follows. The input feature  
 map undergoes LayerNorm2d normalization,  $1 \times 1$  depth-  
 wise convolution to extract refined feature, then is weighted  
 by the Spatial Attention Module (SAM) to emphasize key  
 spatial regions; the resulting weight fused with the origi-  
 nal input, normalized again, fed into Fourier-based Fre-  
 quency Enhancer (FreEnc) for frequency-domain enhance-  
 ment, and finally residual-fused with the intermediate fea-  
 ture to yield the deeply enhanced output.

### 2.2.1. Spatial Attention Module.

SAM is a spatial-channel modulation module, comprising adaptive avgpool that compresses  $H \times W$  to  $1 \times 1$  to capture per-channel global context, and a  $1 \times 1$  convolution for channel-wise attention weight generation (shape  $(B, c, 1, 1)$ ). These weights are element-wise multiplied with original spatial features via broadcasting to achieve dynamic spatial importance modulation.

### 2.2.2. Fourier-based Frequency Enhancer.

The FreEnc serves as the core component of the proposed FMR method. In practice, we first apply real-valued Fourier transform on the input feature map to separate its magnitude and phase components; then optimize the magnitude via a sequential module consisting of  $1 \times 1$  convolutions and LeakyReLU activation. While retaining the original phase, the model retains the original phase, then reconstructs complex values by multiplying the optimized magnitude with trigonometric functions (cosine for the real part, sine for the imaginary part). This is the transformation of complex numbers from **polar coordinates** to Cartesian coordinates (amplitude + phase  $\rightarrow$  real part + imaginary part). Lastly, the optimized “real part + imaginary part” is recombined into a complex frequency domain signal using the tensor function (*e.g.*, `torch.complex` (real, imag) in PyTorch), which is then fed into an inverse Fourier transform to map the feature back to the spatial domain for output.

### 2.2.3. Analysis on SAM and FreEnc component.

As shown in **Tab. 5**, the effectiveness of the spatial attention module and fourier-based frequency enhancer components in the Fourier motion refactor module is further validated.

In row 4th of **Tab. 5**, swapping the order of the SAM and FreEnc resulted in suboptimal performance. In dark optical flow estimation, performing the SAM first to focus on valid motion features and target regions in the spatial domain enables the FreEnc to conduct a targeted frequency-domain refinement of key information afterward, while avoiding the synchronous amplification of noise and invalid data that occurs when FreEnc is applied first, thus achieving superior performance. As shown in row 5th of **Tab. 5**, replacing SAM with a more complex self-attention module added 1.1M parameters but only yielded a 0.02 EPE improvement on VBOF, providing minimal gain for model practicality.

Additionally, we adopted the wavelet-based decomposition and enhancement method [8] and the spatial frequency-based enhancement method [31] to replace our proposed FreEnc. Obviously, they exhibit varying degrees of performance degradation. The wavelet method does not provide features that anchor the target’s spatial positional relationships, such as magnitude (mag), resulting in inadequate modeling of complex motion patterns with spatial components under challenging low-light conditions. Essentially, in contrast to our Fourier-based method, the

spatial frequency method primarily operates on distinct attribute-specific features within the spatial (image) domain, whereas our Fourier-based method transforms image data into the frequency domain to decompose and manipulate signal components based on their frequency characteristics. By contrast, the Fourier method offers unparalleled efficiency in isolating global frequency components (*e.g.*, low-frequency smooth regions, and high-frequency texture details), thereby facilitating tasks, such as large-scale noise suppression and motion patterns prediction. As shown in row 7 of **Tab. 5**, the spatial frequency-based method is confined to image-domain processing.

**Fig. 4** presents the optical flow results of the FMR ablation experiments. The wavelet-based method fails to perform adequately for dark optical flow estimation, leading to distortions in large-scale optical flow fields. By contrast, other methods perform better, yet still exhibit limitations compared to our proposed FMR method. This demonstrates that FMR provides a pioneering frequency-domain approach to dark optical flow estimation, marking an advancement over spatial-domain-only processing.

## 3. Why Do Neural Models with Explicit Flow Field Regression Perform Better Than Conventional Velocity Field Regression?

Today, diffusion and flow matching models in practice commonly predict noise or noised quantities (*e.g.*, velocity field  $v$ ). Given this paradigm, less attention has been paid to what the optical flow network should directly predict, with the implicit assumption that the network is capable of performing the assigned task. However, the roles of clean optical flow and noisy quantities (including noise itself) are not equal. Optical flow is subject to strong constraints from physical laws, such as object motion, occlusion, and geometric principles, thereby giving rise to inherent structural properties such as smoothness and consistency. Importantly, the superposition of noise  $\varepsilon$  onto degraded features and unreliable motion affinities can introduce a domain shift, causing the learned transformation path to deviate from the ideal velocity field trajectory. Intuitively, in dark optical flow estimation, predicting clean optical flow versus estimating noise magnitudes exhibits distinct levels of complexity, whereas directly predicting optical flow represents an inherently more straightforward endeavor.

According to the hypothesis proposed in [3, 4] that “(high-dimensional) data lie (roughly) in a low-dimensional manifold”, optical flow—though residing in a high-dimensional pixel space—is essentially distributed over such a low-dimensional “manifold”. By contrast, noise is purely a random perturbation in the high-dimensional space, devoid of any adherence to manifold structures. Consequently, as a mixture of image-derived signals and noise,

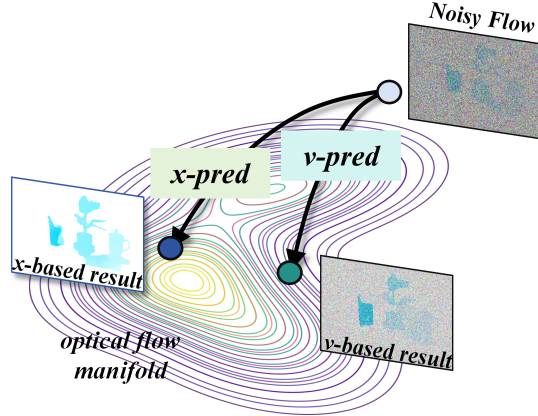

Figure 5. The **Manifold Assumption** [4] posits that natural images lie on a low-dimensional manifold embedded within the high-dimensional pixel space. In the flow matching paradigm, an optical flow  $x$  can be modeled as lying on the manifold, whereas the velocity field  $v$  (e.g.,  $v = gt - \epsilon$ ) is inherently off-manifold. Training a neural network to predict a clean optical flow (i.e.,  $x$ -prediction) yields fundamentally distinct performance relative to training it to predict noisy quantities (e.g.,  $\epsilon$ ,  $v$ -prediction).

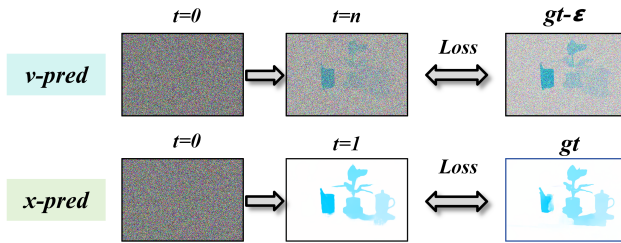

Figure 6. Predictions exhibit distinct discrepancies across different training pipelines. Specifically,  $v$ -pred imposes a highly volatile constraint term during training, compelling the model to adapt to unstructured noise in the high-dimensional space, which is incompatible with the inherent structure attributes of the dark optical flow. As with our proposed FlowFM, directly learning the optical flow field ( $x$ -pred) while conducting denoising enables the model to comprehensively capture the intrinsic characteristics of the data.

353 the velocity field in the flow matching paradigm also falls  
354 outside the bounds of this “manifold”.

355 As illustrated in **Fig. 5**, in the flow matching paradigm,  
356 we provide two pipelines: one is  $x$ , or optical flow pre-  
357 diction ( $x$ -prediction); the other is velocity prediction ( $v$ -  
358 prediction). It can be seen that it is more effective to allocate  
359 the model to directly model optical flow data than to learn  
360 the noise distribution. Therefore, having a neural network  
361 predict a target on the manifold (clean optical flow) and a  
362 target outside the manifold (noise or flow velocity) are two  
363 tasks with completely different levels of difficulty. We be-  
364 lieve that predicting clean optical flow is essentially simpler  
365 because it allows the network to focus on learning the intrinsic

366 low-dimensional structure of the data, while naturally  
367 filtering out high-dimensional noise and dark degeneration.  
368 As shown in **Fig. 6**, in our FlowFM, by minimizing ground  
369 truth distance using loss function  $\mathcal{L}_1$ , enforces the learned  
370 vector field to satisfy the intrinsic low-dimensional struc-  
371 tural representation of optical flow, while naturally filtering  
372 out high-dimensional noise and suppressing interference.

373 To further demonstrate the effectiveness of our method  
374 for directly predicting optical flow sample, we evaluated  
375 the performance of different flow matching strategies on  
376 FCDN and VBOF datasets. **Tab. 6** and **Tab. 7** present the  
377 EPE metrics on the FCDN and Mix datasets, respectively.  
378 It is evident that directly predicting optical flow outper-  
379 forms predicting high-dimensional noise and mixed data,  
380 as low-dimensional optical flow data embodies more promi-  
381 nent structural regularity and smoothness constraints—both  
382 of which are more conducive to dark optical flow.

## 4. Additional Experiment 383

### 4.1. Experiment Setup 384

385 **Datasets.** Similar to previous successful work [31, 32],  
386 we trained on all FCDN data [28], testing the model’s fit-  
387 ting ability on FCDN and generalization on VBOF [26].  
388 For Mix (FCDN + VBOF) dataset, we used all for train-  
389 ing, tested fitting on both datasets, and provided generaliza-  
390 tion visualizations on real-world dark image/video datasets  
391 (FLIR ADAS [7], SDS [23], GOF [11]). We use the end-  
392 point error (EPE) [6] as an evaluation metric to assess the  
393 predicted dark optical flow.

394 **Implementation Details** The proposed FlowFM was im-  
395 plemented on the PyTorch platform, utilizing an Intel (R)  
396 i5 2.59GHz CPU and an NVIDIA RTX 4080 GPU. During  
397 training, we followed the previous work CEDFlow [31] and  
398 CEDFlow++ [32], equipping our FlowFM with the AdamW  
399 optimizer and clipping gradients in the range of  $[-1, 1]$ .  
400 We used the one-cycle learning rate schedule to minimize  
401 loss using the distance  $\mathcal{L} - 1$ . All models were initialized  
402 from scratch with random weights, and the resolution of the  
403 clipped input frames was set to  $368 \times 496$ .

404 For fair comparison, 350k iterations were run on FCDN  
405 dataset and 400k on the Mix dataset during training. The  
406 batch size was set to 4 (training phase) and 1 (testing phase),  
407 while the learning rate was  $2.5e-4$  for both FCDN and Mix  
408 dataset, respectively. For large models like FlowDiffuser  
409 [16] and Flowformer++ [19], we reduced the batch size  
410 under hardware constraints but increased training steps by  
411 150K for fairness. The pre-trained encoders were re-trained  
412 in FCDN.

413 **Comparison Methods.** To our knowledge, few studies  
414 have tackled the challenging DOFE. We evaluated FlowFM  
415 against 15 top performing methods from the Sintel [2]  
416 and KITTI [17] rankings, including PWC-Net [21], RAFT,

Table 6. Analysis on different flow matching strategies evaluations on FCDN and VBOF datasets (trained on FCDN).

| Method                             | Reference | EPE(trained on FCDN)↓ |              |              |             |              |              |             |              |              |              |
|------------------------------------|-----------|-----------------------|--------------|--------------|-------------|--------------|--------------|-------------|--------------|--------------|--------------|
|                                    |           | FCDN                  | Canon        | Fuji         | Fuji2       | Nikon        | Nikon2       | Sony        | Sony2        | Sony3        | VBOF         |
| w/o FM(Flow Matching)              | -         | 1.23                  | 20.76        | 37.58        | 14.20       | 26.54        | 28.77        | 16.46       | 32.97        | 19.52        | 20.47        |
| w/o $v$ -pred (main paper’s Eq.11) | -         | 1.07                  | 14.25        | 28.99        | 11.54       | 21.37        | 22.70        | 12.47       | 20.90        | 14.86        | 16.77        |
| <b>FlowFM(<math>x</math>-pred)</b> | -         | <b>0.87</b>           | <b>12.09</b> | <b>23.96</b> | <b>8.99</b> | <b>17.38</b> | <b>16.59</b> | <b>9.82</b> | <b>16.65</b> | <b>11.97</b> | <b>13.28</b> |

Table 7. Analysis on different flow matching strategies evaluations on FCDN and VBOF datasets (trained on Mix).

| Method                             | Reference | EPE(trained on Mix)↓ |             |             |             |             |             |             |             |             |             |
|------------------------------------|-----------|----------------------|-------------|-------------|-------------|-------------|-------------|-------------|-------------|-------------|-------------|
|                                    |           | FCDN                 | Canon       | Fuji        | Fuji2       | Nikon       | Nikon2      | Sony        | Sony2       | Sony3       | VBOF        |
| w/o FM(Flow Matching)              | -         | 1.27                 | 6.26        | 8.25        | 4.74        | 8.68        | 8.12        | 4.34        | 5.77        | 6.15        | 6.10        |
| w/o $v$ -pred (main paper’s Eq.11) | -         | 1.10                 | 5.97        | 8.15        | 3.96        | 7.21        | 8.72        | 4.14        | 5.40        | 6.03        | 5.82        |
| <b>FlowFM(<math>x</math>-pred)</b> | -         | <b>1.06</b>          | <b>5.83</b> | <b>7.03</b> | <b>3.30</b> | <b>6.75</b> | <b>7.85</b> | <b>3.74</b> | <b>4.37</b> | <b>5.98</b> | <b>5.24</b> |

417 GMA, SCV [10], Flow1D [24], GyroFlow [11], GM-  
418 FlowNet [27], GMFlow [25], AGFlow, KPAFlow [13], C-  
419 RAFT [20], GAFlow [15], Flowformer++, FlowDiffuser,  
420 and DPFlow [18]. And DOFE-oriented CEDFlow [31] and  
421 CEDFlow++ [32], excluding code-unreleased ABDA-Flow  
422 [29] and multi-modal [5].

## 423 4.2. Comparison with State-of-the-Arts

424 **Trained on FCDN.** As illustrated in Tab. 8, we provide ad-  
425 ditional quantitative evaluations on 17 state-of-the-art meth-  
426 ods. The proposed FlowFM achieves an EPE score of 0.87  
427 on the FCDN dataset. It outperforms well-known meth-  
428 ods including GMFlow, C-RAFT, and GAFlow and even  
429 exceeds the recent CEDFlow by 19.4% (1.08  $\rightarrow$  0.87) and  
430 CEDFlow++ by 13.8% (1.01  $\rightarrow$  0.87). From columns 4 to  
431 12 of Tab. 8, generalization evaluations on Canon, Fuji,  
432 Fuji2, Nikon, Nikon2, Sony, Sony2, Sony3, and VBOF  
433 (all parts) show that our FlowFM achieves remarkable ro-  
434 bustness in dark scenes. These results demonstrate that  
435 FlowFM outperforms other state-of-the-art models in effec-  
436 tively tackling DOFE tasks, thanks to its masked global en-  
437 coder and graph-based motion reconstruction.

438 **Trained on Mix.** Tab. 9 depicts a quantitative evaluation  
439 using FlowFM trained on the Mix (FCDN + VBOF) dataset.  
440 Compared with existing SOTA methods, FlowFM achieves  
441 significantly better performance, with superior EPE scores  
442 on VBOF and its subsets. While optical flow methods  
443 generally exhibit strong performance, most advanced ap-  
444 proaches still face notable challenges under substantial il-  
445 lumination variations, with AGFlow and GAFlow yielding  
446 particularly poor results.

## 447 4.3. Why Do Models Trained on Mix Yield Higher 448 EPE on FCDN Than FCDN-Only?

449 Notably, models trained on the more complex Mix dataset  
450 typically yield higher EPE scores on the FCDN dataset

than those trained solely on the FCDN. This is because  
the noise distribution of FCDN differs from that of VBOF,  
which VBOF incorporates camera-specific sensor noise,  
dark noise, and color distortion. During Mix training, the  
models must adapt to these two distinct noise modes, which  
weakens their specialization in the FCDN noise pattern.  
Additionally, the ground truth of the VBOF is estimated  
from ideally exposed images rather than directly rendered  
optical flow, thus introducing minor inaccuracies.

The two key aspects are summarized:

**Experiment 1 (noise distribution isolation evaluation):**  
We randomly selected 100 illumination-ideal image pairs  
from FCDN. The Mix (original) consists of this FCDN  
subset and 100 illumination-ideal image pairs from VBOF.  
Mix (noise corrected) comprises the FCDN subset and 100  
illumination-ideal image pairs from VBOF without dark  
noise and color distortion injection. In the Mix training  
phase, we used the same batch size and learning rate as  
those in the original manuscript, with a total of 100k epochs.  
As shown in Tab.10, it can be observed that the EPE val-  
ues of Mix (noise corrected) are lower and closer to those  
of FCDN, which indirectly confirms that noise distribution  
mismatch is the key factor causing performance degrada-  
tion.

**Experiment 2 (flow label accuracy analysis):** To ver-  
ify the impact of the accuracy of VBOF’s optical flow la-  
bels on FCDN performance, we trained the model using  
‘FCDN+VBOF’ with corrected optical flow labels (where  
the labels were corrected using the SOTA method DPFlow  
[18]). Due to constraints, we only tested 100 image pairs  
from Experiment 1 to observe whether the performance on  
the FCDN dataset was restored, thus verifying the impact  
of VBOF label bias on model training. As shown in Fig.  
7, we also supplemented the visualization results for refer-  
ence. The vast majority of optical flow labels in VBOF are  
accurate; we only identified a small number of images with

Table 8. EPE comparison of different optical flow evaluations on FCDN and VBOF datasets (trained on FCDN dataset). Bold indicates best performance, while underlining denotes second rank.

| Method              | Reference | EPE(trained on FCDN)↓ |              |              |              |              |              |              |              |              |              |
|---------------------|-----------|-----------------------|--------------|--------------|--------------|--------------|--------------|--------------|--------------|--------------|--------------|
|                     |           | FCDN                  | Canon        | Fuji         | Fuji2        | Nikon        | Nikon2       | Sony         | Sony2        | Sony3        | VBOF         |
| PWC-Net[21]         | CVPR-18   | 1.81                  | 24.10        | 54.38        | 15.77        | 33.65        | 31.57        | 18.49        | 38.71        | 22.83        | 26.77        |
| RAFT[22]            | ECCV-20   | 1.23                  | 20.25        | 39.52        | 14.20        | 26.40        | 25.45        | 15.61        | 32.43        | 19.16        | 21.84        |
| GMA[9]              | CVPR-21   | 1.18                  | 20.37        | 39.64        | 14.40        | 27.54        | 26.07        | 15.83        | 30.23        | 19.04        | 21.77        |
| SCV[10]             | CVPR-21   | 1.29                  | 22.47        | 42.08        | 14.96        | 29.43        | 27.50        | 17.29        | 37.95        | 22.01        | 24.13        |
| FlowID[24]          | ICCV-21   | 1.22                  | 21.01        | 49.33        | 14.25        | 28.93        | 27.48        | 16.72        | 37.63        | 21.86        | 21.79        |
| GyroFlow[11]        | ICCV-21   | 1.79                  | 23.38        | 50.07        | 15.52        | 31.54        | 28.82        | 17.10        | 39.53        | 22.37        | 24.76        |
| GMFlowNet[27]       | CVPR-22   | 1.56                  | 21.80        | 41.78        | 14.51        | 26.76        | 26.71        | 15.52        | 34.77        | 20.03        | 22.87        |
| GMFlow[25]          | CVPR-22   | 1.18                  | 19.79        | 39.83        | 14.56        | 27.96        | 25.30        | 15.29        | 30.33        | 18.85        | 22.72        |
| AGFlow[14]          | AAAI-22   | 1.15                  | 20.13        | 39.79        | 14.16        | 26.30        | 25.15        | 16.31        | 30.67        | 18.78        | 21.05        |
| KPAFlow[13]         | CVPR-22   | 1.24                  | 22.19        | 47.21        | 14.71        | 29.97        | 27.58        | 16.15        | 36.65        | 21.61        | 23.10        |
| C-RAFT[20]          | CVPR-22   | 1.20                  | 21.55        | 39.78        | 14.49        | 27.55        | 26.24        | 15.46        | 30.91        | 19.72        | 22.04        |
| GAFflow[15]         | ICCV-23   | 1.10                  | <b>19.53</b> | 37.31        | 13.95        | 25.37        | 24.70        | 15.21        | 30.37        | 19.13        | 20.84        |
| Flowformer++[19]    | CVPR-23   | 1.12                  | 20.09        | 39.34        | 14.03        | 25.49        | 25.46        | 15.10        | 30.32        | 18.87        | 20.94        |
| FlowDiffuser[16]    | CVPR-24   | 1.09                  | 19.83        | 36.74        | 14.00        | 25.32        | <b>24.26</b> | 15.17        | 30.57        | 19.14        | 20.77        |
| CEDFlow[31]         | AAAI-24   | 1.08                  | 19.69        | 39.21        | 13.94        | <b>25.24</b> | <b>25.09</b> | 15.16        | 30.30        | <b>18.73</b> | 20.89        |
| DPFlow[18]          | CVPR-25   | 1.17                  | 19.88        | 37.20        | 14.32        | <b>26.07</b> | 25.56        | 15.20        | <b>27.73</b> | 19.29        | 20.92        |
| CEDFlow++[32]       | IJCV-25   | <b>1.01</b>           | 20.07        | <b>34.82</b> | <b>13.93</b> | 25.85        | 24.34        | <b>15.05</b> | 28.58        | 19.00        | <b>20.56</b> |
| <b>FlowFM(Ours)</b> | -         | <b>0.87</b>           | <b>12.09</b> | <b>23.96</b> | <b>8.99</b>  | <b>17.38</b> | <b>16.59</b> | <b>9.82</b>  | <b>16.65</b> | <b>11.97</b> | <b>13.28</b> |

Table 9. EPE comparison of different flow evaluations on FCDN and VBOF datasets (trained on Mix dataset). Bold indicates best performance, while underlining denotes second rank.

| Method              | Reference | EPE(trained on Mix)↓ |             |             |             |             |             |             |             |             |             |
|---------------------|-----------|----------------------|-------------|-------------|-------------|-------------|-------------|-------------|-------------|-------------|-------------|
|                     |           | FCDN                 | Canon       | Fuji        | Fuji2       | Nikon       | Nikon2      | Sony        | Sony2       | Sony3       | VBOF        |
| PWC-Net[21]         | CVPR-18   | 1.92                 | 10.64       | 18.48       | 8.06        | 13.45       | 13.77       | 7.97        | 13.15       | 12.92       | 9.90        |
| RAFT[22]            | ECCV-20   | 1.38                 | 8.25        | 16.77       | 7.34        | 11.43       | 12.06       | 6.00        | 11.56       | 11.29       | 8.89        |
| GMA[9]              | CVPR-21   | 1.26                 | 6.33        | 10.11       | 4.90        | 11.56       | 11.96       | 5.16        | 7.04        | 6.63        | 6.81        |
| SCV[10]             | CVPR-21   | 1.27                 | 7.41        | 15.78       | 6.48        | 11.79       | 12.37       | 5.84        | 11.83       | 11.21       | 7.76        |
| FlowID[24]          | ICCV-21   | 1.30                 | 6.60        | 10.34       | 5.13        | 10.93       | 13.44       | 6.07        | 7.63        | 7.19        | 6.93        |
| GyroFlow[11]        | ICCV-21   | 1.83                 | 8.77        | 16.49       | 7.92        | 12.32       | 12.75       | 7.17        | 10.44       | 12.36       | 9.40        |
| GMFlowNet[27]       | CVPR-22   | 1.70                 | 9.09        | 16.16       | 7.71        | 12.74       | 12.82       | 7.26        | 10.71       | 11.20       | 8.66        |
| GMFlow[25]          | CVPR-22   | 1.31                 | 6.26        | 10.69       | 5.76        | 10.90       | 10.76       | 5.69        | 6.74        | 6.88        | 7.23        |
| AGFlow[14]          | AAAI-22   | 1.27                 | 6.25        | 10.34       | 4.97        | 8.61        | 10.01       | 5.15        | 6.51        | 6.76        | 6.75        |
| KPAFlow[13]         | CVPR-22   | 1.39                 | 7.36        | 12.70       | 6.11        | 10.14       | 10.51       | 6.22        | 8.71        | 8.37        | 7.47        |
| C-RAFT[20]          | CVPR-22   | 1.27                 | 6.87        | 10.79       | 5.45        | 9.74        | 10.21       | 5.93        | 6.88        | 7.02        | 7.04        |
| GAFflow[15]         | ICCV-23   | 1.26                 | 6.27        | 9.87        | 4.76        | 8.24        | 9.90        | 6.03        | 6.72        | 6.84        | 6.79        |
| Flowformer++[19]    | CVPR-23   | 1.24                 | 6.22        | 9.73        | 4.77        | 8.38        | 9.72        | 4.64        | 6.74        | 6.82        | 6.46        |
| FlowDiffuser[16]    | CVPR-24   | 1.20                 | 6.38        | 9.74        | 4.40        | 9.32        | 9.63        | 5.11        | 6.57        | 6.89        | 6.57        |
| CEDFlow[31]         | AAAI-24   | 1.23                 | 6.22        | <b>9.41</b> | 4.69        | 8.23        | 9.87        | 4.66        | 6.50        | <b>6.10</b> | 6.52        |
| DPFlow[18]          | CVPR-25   | 1.24                 | 6.31        | 9.55        | 4.56        | 7.80        | 9.50        | 4.74        | 6.23        | <b>6.43</b> | <b>6.21</b> |
| CEDFlow++[32]       | IJCV-25   | <b>1.14</b>          | <b>5.85</b> | 9.66        | <b>4.38</b> | <b>7.45</b> | <b>9.29</b> | <b>4.63</b> | <b>6.18</b> | 6.77        | 6.25        |
| <b>FlowFM(Ours)</b> | -         | <b>1.06</b>          | <b>5.83</b> | <b>7.03</b> | <b>3.30</b> | <b>6.75</b> | <b>7.85</b> | <b>3.74</b> | <b>4.37</b> | <b>5.98</b> | <b>5.24</b> |

487 minor label errors, which slightly interfere with the model’s  
488 learning of motion patterns.

489 Notably, due to the small test sample size, we do not  
490 intend to include these results in the main paper. How-  
491 ever, they can indirectly confirm that the ‘synthesis-to-real  
492 domain shift’ resulting from Mix training is the main fac-  
493 tor that causes the performance degradation on the FCDN  
494 dataset. Going forward, we will substantially refine the  
495 VBOF labels.

#### 4.4. Visual Comparison with State-of-the-Arts 496

497 **Trained on FCDN.** Fig. 8 presents a qualitative compar-  
498 ison of representative methods on the challenging FCDN  
499 dataset. Obviously, in Fig. 8, our FlowFM demonstrates  
500 advantages in terms of high optical flow accuracy (closest to  
501 the ground truth in shape and position within the red-circled  
502 area) and strong effectiveness in low-light FCDN scenar-  
503 ios, significantly outperforming methods such as CEDFlow,  
504 DPFlow, and CEDFlow++. Fig. 9 provides a general-  
505 ization performance evaluation on the challenging VBOF

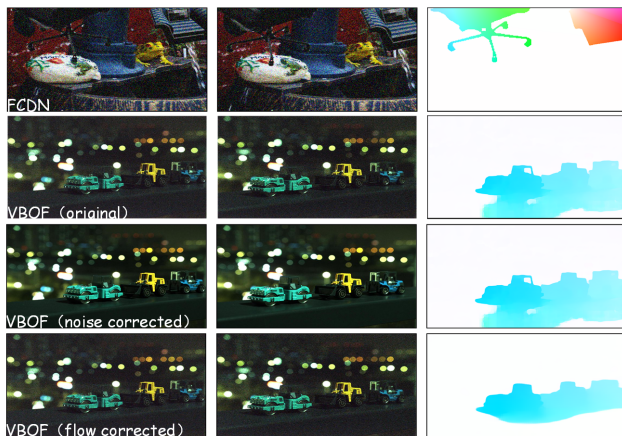

Figure 7. Flow label analysis of Mix dataset domain shift.

Table 10. Noise distribution analysis of Mix dataset domain shift.

| Method               | EPE(trained on FCDN or Mix) |       |       |       |
|----------------------|-----------------------------|-------|-------|-------|
|                      | FCDN                        | Canon | Nikon | VBOF  |
| FCDN                 | 0.85                        | 11.79 | 16.28 | 13.15 |
| Mix(original)        | 1.01                        | 4.34  | 6.46  | 5.33  |
| Mix(noise corrected) | 0.99                        | 4.32  | 6.45  | 5.27  |
| Mix(flow corrected)  | 1.00                        | 4.34  | 6.45  | 5.29  |

dataset (featuring heavy noise and dark environments); in this dataset, the optical flow results of FlowDiffuser, CEDFlow, and CEDFlow++ exhibit blurred regions, unclear boundaries, and insufficient restoration of shape details for background and car contours. By contrast, our FlowFM delineates much sharper contours and scenes that are highly consistent with the ground truth, thanks to our proposed specific methods, *e.g.*, flow matching with explicit flow field regression and the frequency-domain enhancement.

**Trained on Mix.** Fig. 10 presents a qualitative comparison of representative methods on the FCDN dataset. All of these methods are trained on the Mix dataset. It can be seen that our FlowFM achieves clear and accurate optical flow results for the legs of the bench and the outlines of the chair within the purple box, significantly outperforming methods such as CEDFlow, DPFlow, and CEDFlow++. Fig. 11 presents an evaluation of the challenging VBOF dataset with strong heavy noise; in this scene, the flow results of FlowDiffuser, CEDFlow, and CEDFlow++ for background and car contours exhibit blurred regions, unclear boundaries, and insufficient restoration of shape details. In contrast, FlowFM delineates much sharper contours and scenes that are highly consistent with the ground truth.

**Real-world flow evaluation.** To further explore FlowFM’s generalization and robustness in real-world dark scenarios. Fig. 12 shows its optical flow results on the FLIR ADAS

[7], SDSD [23], and GOF [11] datasets. The FLIR ADAS dataset encompasses a variety of night driving scenarios with rapid object motion, profound darkness, and multiple light sources. The SDSD comprises 150 high-resolution spatially aligned video pairs that show the same scenes in both low and normal lighting. The GOF contains real-world scenes in 4 different categories with synchronized gyro readings, including a regular scene and three challenging cases such as low-light, foggy, and rainy scenes. **Despite the fact that FLIR ADAS, SDSD, and GOF lack optical flow ground truth**, FlowFM exhibits superior performance in these real-world conditions characterized by fast-moving objects, dynamic scenes, and varied lighting.

To be specific, Fig. 12 presents three challenging dark scenarios: GOF (dark, low-illuminated, blurry, and rapidly moving targets), where motion targets lack significant discriminative attributes, FLIR ADAS (dark, noisy with multi-light sources, with dense shadows); and SDSD (dark, with scarce textures and prominent noise). In these challenging cases, Flowformer++, FlowDiffuser, CEDFlow, and DPFlow all produce severely blurred optical flow results. For example, vehicle contours are severely blurred in GOF, and details of the circular ring on the table disappear in SDSD. These challenges pose a significant issue, stemming from poor feature discriminability and low visibility conditions. CEDFlow++ shows partial effectiveness but has fragmented details (*e.g.*, fractured vehicle edges in GOF, blurred and distorted shapes in SDSD). Our FlowFM, leveraging the noise robustness of the flow matching strategy and implicit Fourier-based enhancement, retains flow field details more comprehensively and outperforms CEDFlow and CEDFlow++ in the majority of scenarios.

#### 4.5. Limitation Analysis

In particular, our approach has limitations in the dark. As shown in Fig. 13, in dark and high-dynamic range scenes that contain large same-attribute motion, extremely small targets, such as GOF data where discriminative features are almost absent (*e.g.*, DID’s bottom region), accurate motion estimation is impaired by a critical visual cue deficit. Future work will inject priors or multi-modal data to alleviate these extreme limitations, and adapt the FlowFM module to other vision tasks with higher efficiency and accuracy.

## References

- [1] Wasi Uddin Ahmad, Nanyun Peng, and Kai-Wei Chang. Gate: graph attention transformer encoder for cross-lingual relation and event extraction. In *AAAI*, pages 12462–12470, 2021. 4
- [2] Daniel J Butler, Jonas Wulff, Garrett B Stanley, and Michael J Black. A naturalistic open source movie for optical flow evaluation. In *ECCV*, pages 611–625. Springer, 2012. 6

- [3] Gunnar Carlsson. Topology and data. *Bulletin of the American Mathematical Society*, 46(2):255–308, 2009. 5
- [4] Olivier Chapelle, Bernhard Scholkopf, and Alexander Zien. Semi-supervised learning (chapelle, o. et al., eds.; 2006)[book reviews]. *IEEE Transactions on Neural Networks*, 20(3):542–542, 2009. 5, 6
- [5] Weichen Dai, Hexing Wu, Xiaoyang Weng, Yuxin Zheng, Yuhang Ming, and Wanzeng Kong. Multi-modal synergistic implicit image enhancement for efficient optical flow estimation. In *CVPR*, pages 2173–2182, 2025. 7
- [6] Alexey Dosovitskiy, Philipp Fischer, Eddy Ilg, Philip Hausser, Caner Hazirbas, Vladimir Golkov, Patrick Van Der Smagt, Daniel Cremers, and Thomas Brox. FlowNet: Learning optical flow with convolutional networks. In *ICCV*, pages 2758–2766, 2015. 6
- [7] F. A. Group. Flir thermal dataset for algorithm training. In <https://www.flir.in/oem/adas/adas-dataset-form/>, 2018. 6, 9
- [8] Hai Jiang, Ao Luo, Haoqiang Fan, Songchen Han, and Shuaicheng Liu. Low-light image enhancement with wavelet-based diffusion models. *ACM TOG*, 42(6):1–14, 2023. 5
- [9] Shihao Jiang, Dylan Campbell, Yao Lu, Hongdong Li, and Richard Hartley. Learning to estimate hidden motions with global motion aggregation. In *ICCV*, pages 9772–9781, 2021. 3, 8
- [10] Shihao Jiang, Yao Lu, Hongdong Li, and Richard Hartley. Learning optical flow from a few matches. In *CVPR*, pages 16592–16600, 2021. 7, 8
- [11] Haipeng Li, Kunming Luo, and Shuaicheng Liu. Gyroflow: Gyroscope-guided unsupervised optical flow learning. In *ICCV*, pages 12869–12878, 2021. 6, 7, 8, 9
- [12] Jiachen Lu, Jinghan Yao, Junge Zhang, Xiatian Zhu, Hang Xu, Weiguo Gao, Chunjing Xu, Tao Xiang, and Li Zhang. Soft: Softmax-free transformer with linear complexity. *NeurIPS*, 34:21297–21309, 2021. 4
- [13] Ao Luo, Fan Yang, Xin Li, and Shuaicheng Liu. Learning optical flow with kernel patch attention. In *CVPR*, pages 8906–8915, 2022. 7, 8
- [14] Ao Luo, Fan Yang, Kunming Luo, Xin Li, Haoqiang Fan, and Shuaicheng Liu. Learning optical flow with adaptive graph reasoning. In *AAAI*, pages 1890–1898, 2022. 8
- [15] Ao Luo, Fan Yang, Xin Li, Lang Nie, Chunyu Lin, Haoqiang Fan, and Shuaicheng Liu. Gafflow: Incorporating gaussian attention into optical flow. In *CVPR*, pages 9642–9651, 2023. 7, 8
- [16] Ao Luo, Xin Li, Fan Yang, Jiangyu Liu, Haoqiang Fan, and Shuaicheng Liu. Flowdiffuser: Advancing optical flow estimation with diffusion models. In *CVPR*, pages 19167–19176, 2024. 4, 6, 8
- [17] Moritz Menze and Andreas Geiger. Object scene flow for autonomous vehicles. In *CVPR*, pages 3061–3070, 2015. 6
- [18] Henrique Morimitsu, Xiaobin Zhu, Roberto M Cesar, Xiangyang Ji, and Xu-Cheng Yin. Dpflow: Adaptive optical flow estimation with a dual-pyramid framework. In *CVPR*, pages 17810–17820, 2025. 7, 8
- [19] Xiaoyu Shi, Zhaoyang Huang, Dasong Li, Manyuan Zhang, Ka Chun Cheung, Simon See, Hongwei Qin, Jifeng Dai, and Hongsheng Li. Flowformer++: Masked cost volume autoencoding for pretraining optical flow estimation. In *CVPR*, pages 1599–1610, 2023. 6, 8
- [20] Xiuchao Sui, Shaohua Li, Xue Geng, Yan Wu, Xinxing Xu, Yong Liu, Rick Goh, and Hongyuan Zhu. Craft: Cross-attentional flow transformer for robust optical flow. In *CVPR*, pages 17602–17611, 2022. 7, 8
- [21] Deqing Sun, Xiaodong Yang, Ming-Yu Liu, and Jan Kautz. Pwc-net: Cnns for optical flow using pyramid, warping, and cost volume. In *CVPR*, pages 8934–8943, 2018. 6, 8
- [22] Zachary Teed and Jia Deng. Raft: Recurrent all-pairs field transforms for optical flow. In *ECCV*, pages 402–419. Springer, 2020. 1, 8
- [23] Ruixing Wang, Xiaogang Xu, Chi-Wing Fu, Jiangbo Lu, Bei Yu, and Jiaya Jia. Seeing dynamic scene in the dark: A high-quality video dataset with mechatronic alignment. In *ICCV*, pages 9700–9709, 2021. 6, 9
- [24] Haofei Xu, Jiaolong Yang, Jianfei Cai, Juyong Zhang, and Xin Tong. High-resolution optical flow from 1d attention and correlation. In *ICCV*, pages 10498–10507, 2021. 7, 8
- [25] Haofei Xu, Jing Zhang, Jianfei Cai, Hamid Rezaatofighi, and Dacheng Tao. Gmflow: Learning optical flow via global matching. In *CVPR*, pages 8121–8130, 2022. 3, 7, 8
- [26] Mingfang Zhang, Yinqiang Zheng, and Feng Lu. Optical flow in the dark. *TPAMI*, 2021. 6
- [27] Shiyu Zhao, Long Zhao, Zhixing Zhang, Enyu Zhou, and Dimitris Metaxas. Global matching with overlapping attention for optical flow estimation. In *CVPR*, pages 17592–17601, 2022. 7, 8
- [28] Yinqiang Zheng, Mingfang Zhang, and Feng Lu. Optical flow in the dark. In *CVPR*, pages 6749–6757, 2020. 6
- [29] Hanyu Zhou, Yi Chang, Haoyue Liu, Wending Yan, Yuxing Duan, Zhiwei Shi, and Luxin Yan. Exploring the common appearance-boundary adaptation for nighttime optical flow. *arXiv preprint arXiv:2401.17642*, 2024. 7
- [30] Xizhou Zhu, Weijie Su, Lewei Lu, Bin Li, Xiaogang Wang, and Jifeng Dai. Deformable detr: Deformable transformers for end-to-end object detection. *arXiv preprint arXiv:2010.04159*, 2020. 2
- [31] Fengyuan Zuo, Zhaolin Xiao, Haiyan Jin, and Haonan Su. Cedflow: Latent contour enhancement for dark optical flow estimation. In *AAAI*, pages 7909–7916, 2024. 2, 5, 6, 7, 8
- [32] Fengyuan Zuo, Haiyan Jin, Zhaolin Xiao, and Haonan Su. Cedflow++: Latent contour enhancement for dark optical flow estimation. In *IJCV*, pages 1–20, 2025. 2, 4, 6, 7, 8

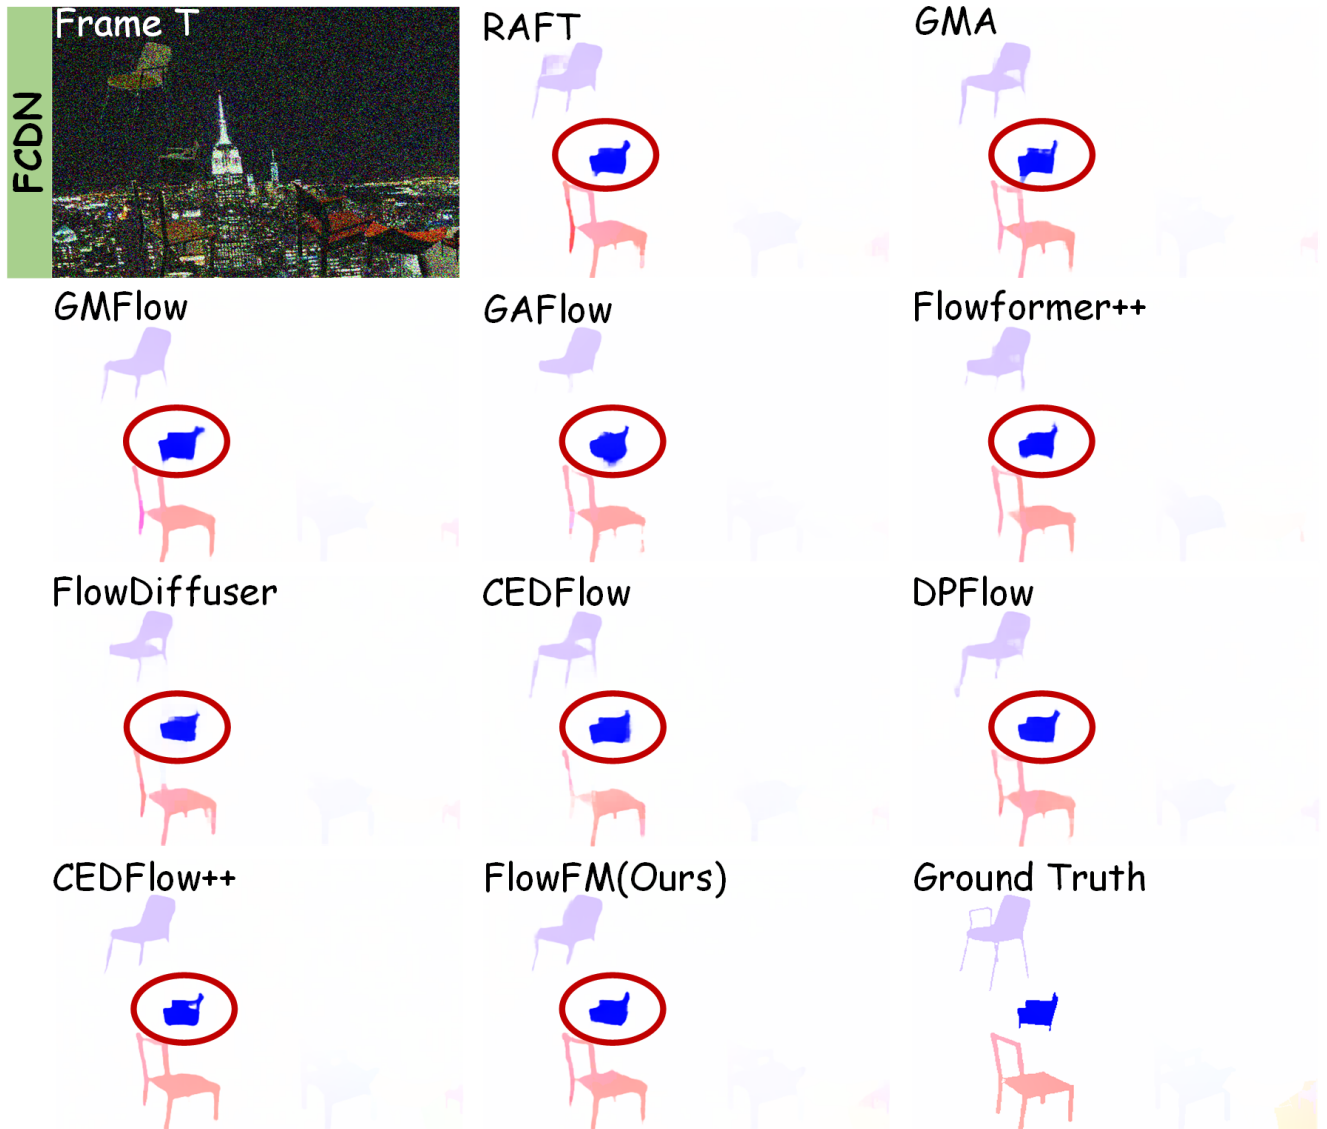

Figure 8. Qualitative comparisons of FlowFM with RAFT, GMA, GMFlow, GAFlow, Flowformer++, FlowDiffuser, CEDFlow, DPFlow, and CEDFlow++ are presented on FCDN dataset (trained on FCDN). Red box represents the difference area of dark optical flow.

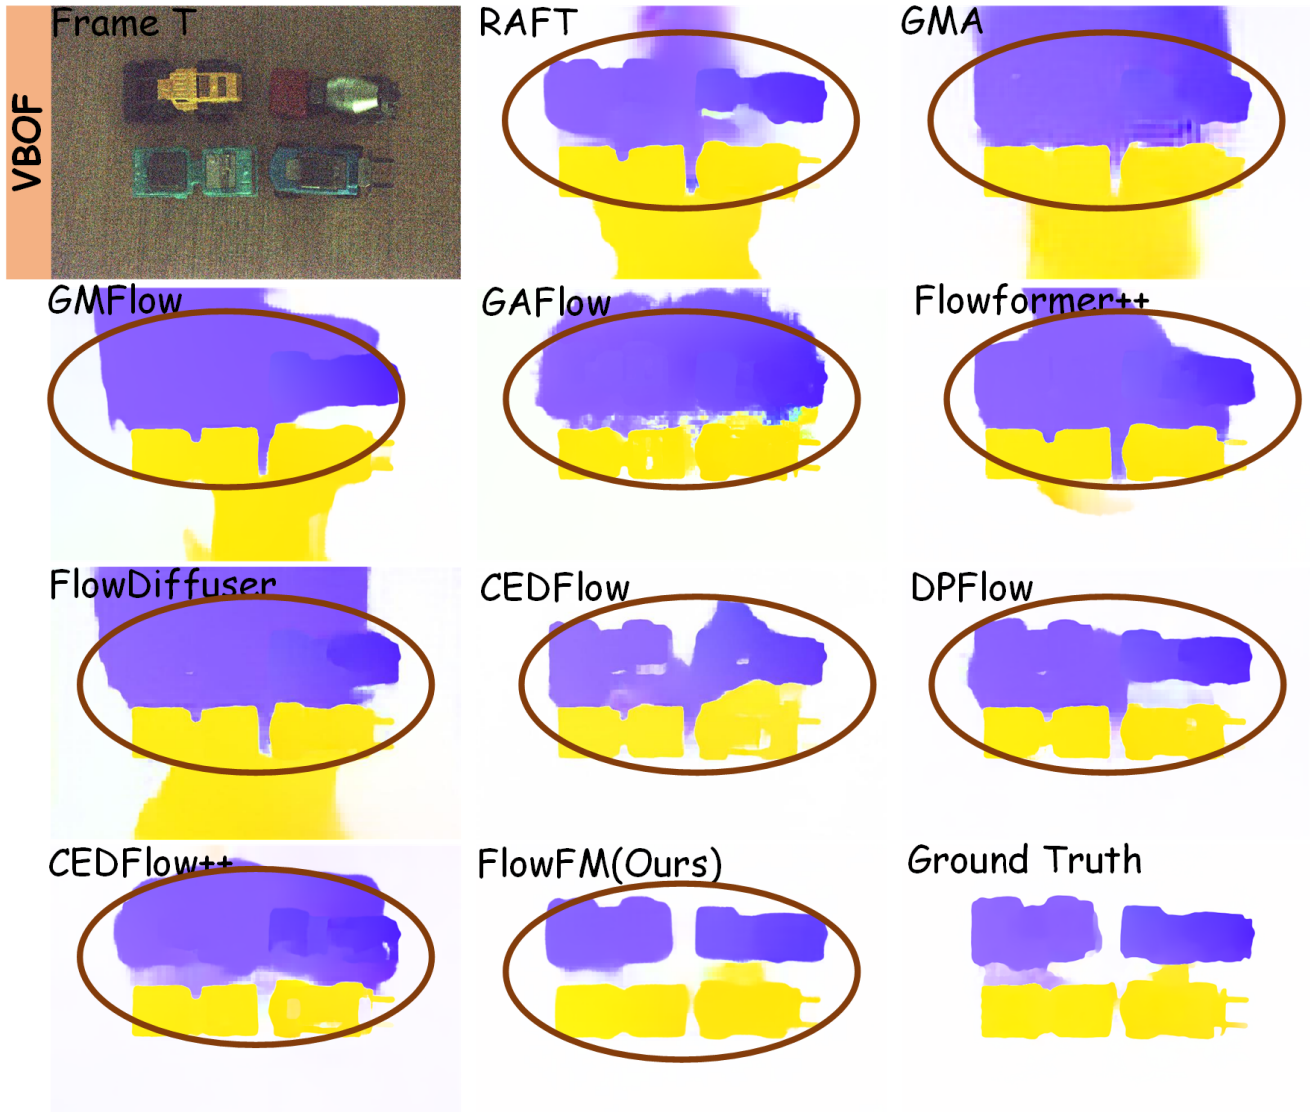

Figure 9. Generalization comparisons of FlowFM with RAFT, GMA, GMFlow, GAFlow, Flowformer++, FlowDiffuser, CEDFlow, DPFlow, and CEDFlow++ are presented on the challenging VBOF dataset (trained on FCDN). Color box denotes the difference area of dark optical flow.

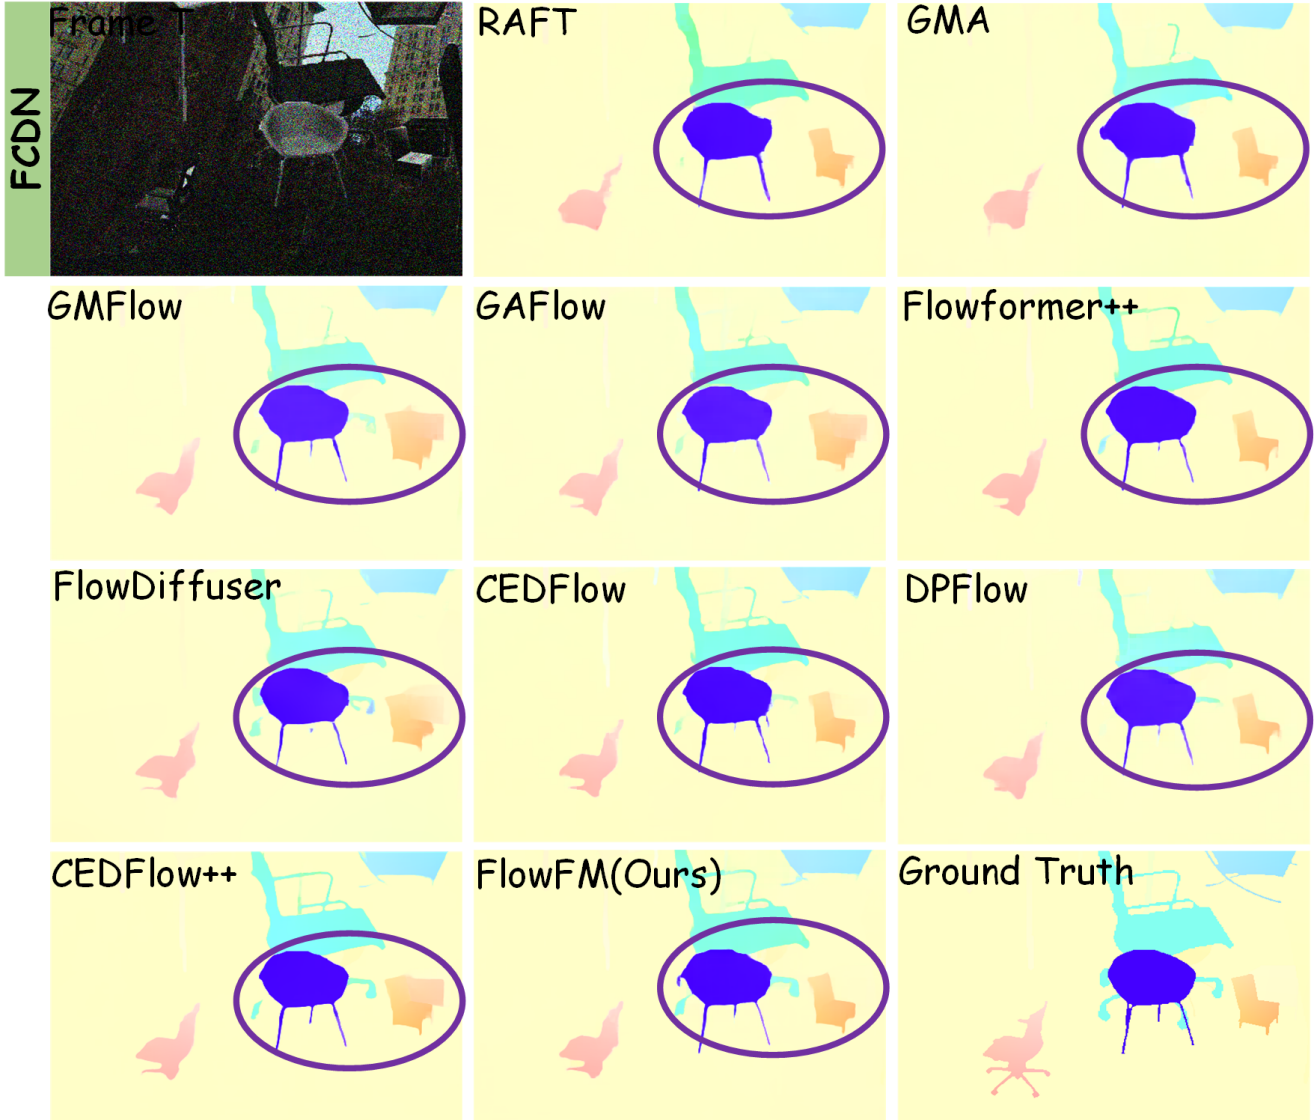

Figure 10. Qualitative comparisons of FlowFM with RAFT, GMA, GMFlow, GAFlow, Flowformer++, FlowDiffuser, CEDFlow, DPFlow, and CEDFlow++ are presented on FCDN dataset (trained on Mix). Purple box denotes the difference area of dark optical flow.

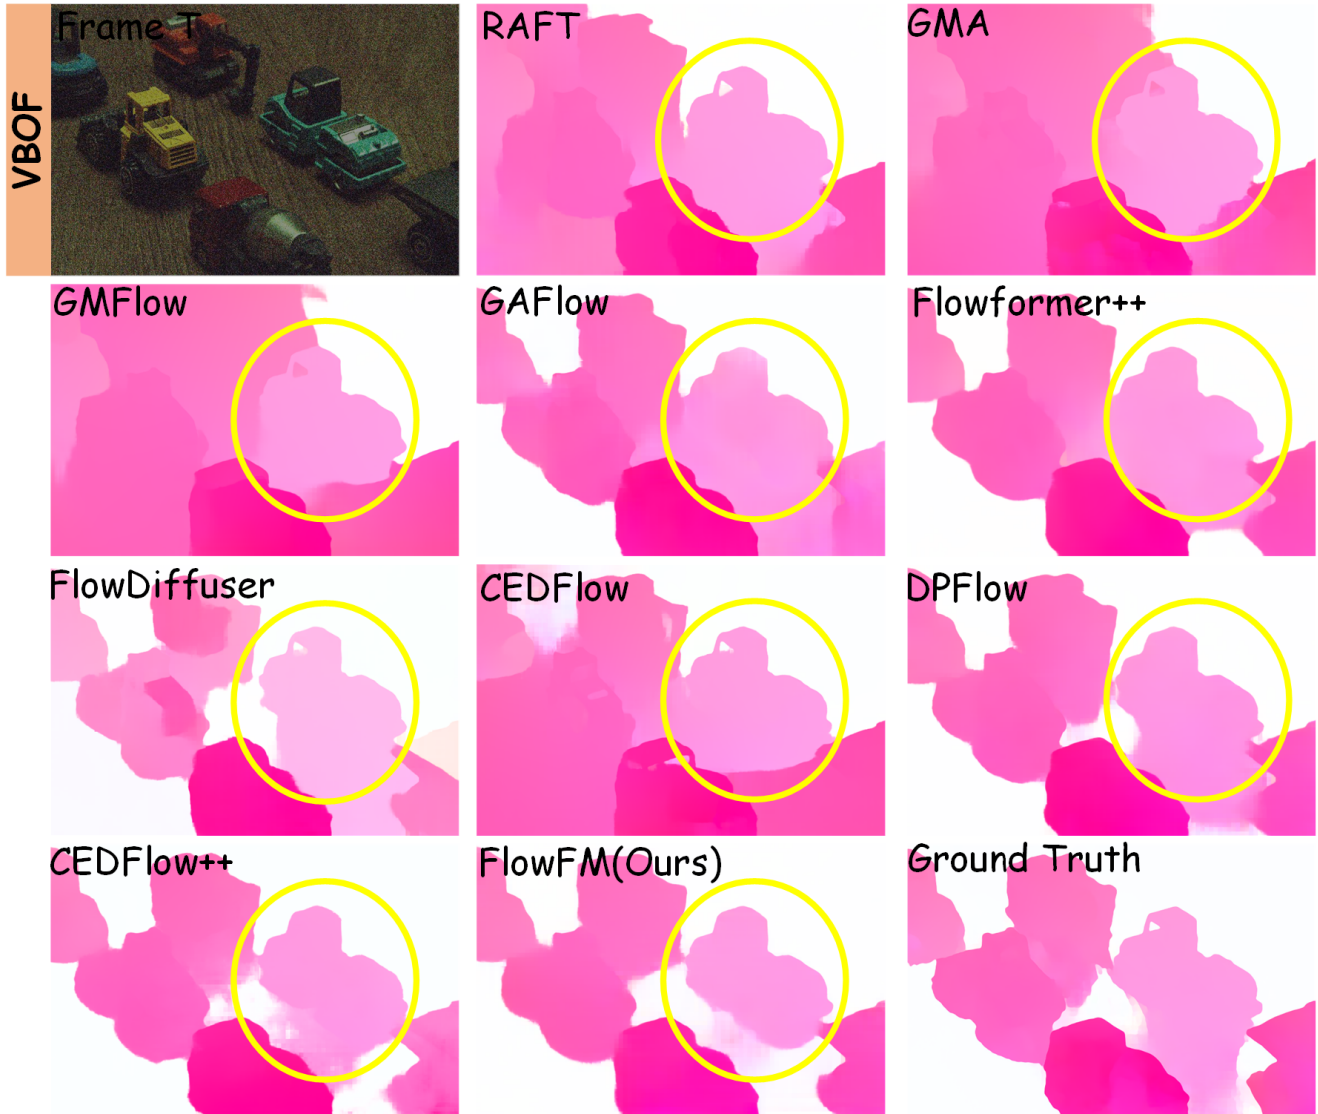

Figure 11. Qualitative comparisons of FlowFM with RAFT, GMA, GMFlow, GAFlow, Flowformer++, FlowDiffuser, CEDFlow, DPFlow, and CEDFlow++ are presented on the challenging VBOF dataset (trained on Mix). Yellow box denotes the difference area of dark optical flow.

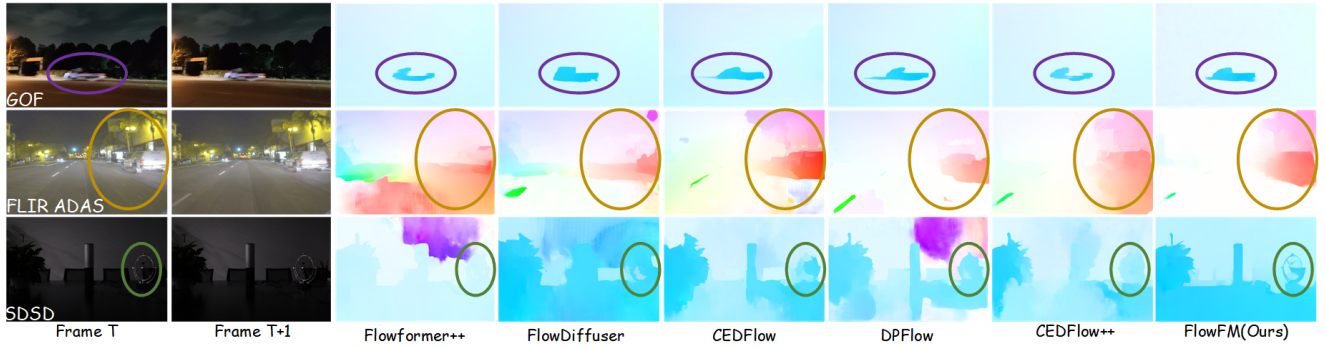

Figure 12. The DOFE results on the FLIR ADAS (a), SDSD (b), and GOF (c) datasets demonstrate FlowFM's ability to effectively manage rapid motions, complex visual elements, and exhibit significant generalizability in real-world driving scenarios and low-light conditions (Best viewed with Zoom).

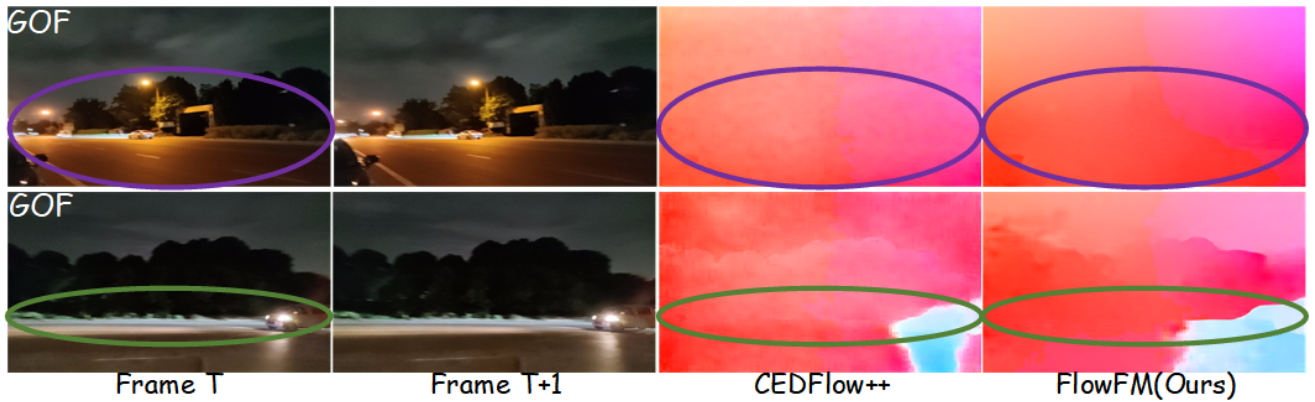

Figure 13. Failure cases.
